# Supplementary material for: Highly efficient carbon dot-based room-temperature fluorescence–phosphorescence dual emitter
Source: Royal Society of Chemistry journal article supplement (doi:10.1039/d1tc04051k), 2021-01-01
Supplement: d1tc04051k1.pdf [file d1tc04051k1.pdf]

## Supporting Information

### **Highly Efficient Carbon Dots Based Room-Temperature Fluorescence– Phosphorescence Dual Emitter**

Biao Zhao,<sup>a,b</sup> Runnan Yu,<sup>a</sup> Kunxiang Xu,<sup>a</sup> Chao Zou,<sup>\*b</sup> Huanyu Ma,<sup>a</sup> Songnan Qu,<sup>c</sup>  
Zhan'ao Tan<sup>\*a</sup>

<sup>a</sup>Beijing Advanced Innovation Center for Soft Matter Science and Engineering, State  
Key Laboratory of Organic–Inorganic Composites, Beijing University of Chemical  
Technology, Beijing 100029, China.

<sup>b</sup>College of Chemistry and Materials Engineering, Wenzhou University, Wenzhou  
325027, China.

<sup>c</sup>Joint Key Laboratory of the Ministry of Education, Institute of Applied Physics and  
Materials Engineering, University of Macau, Avenida da Universidade Taipa 999078,  
Macau, China

\*Corresponding author: tanzhanao@mail.buct.edu.cn; zouchao@wzu.edu.cn

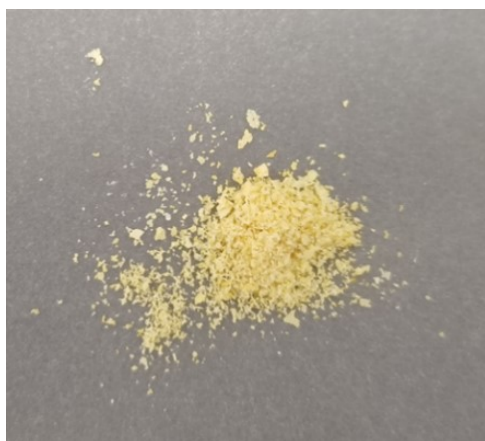

**Figure S1.** Digital photograph of the FP-CDs under daylight.

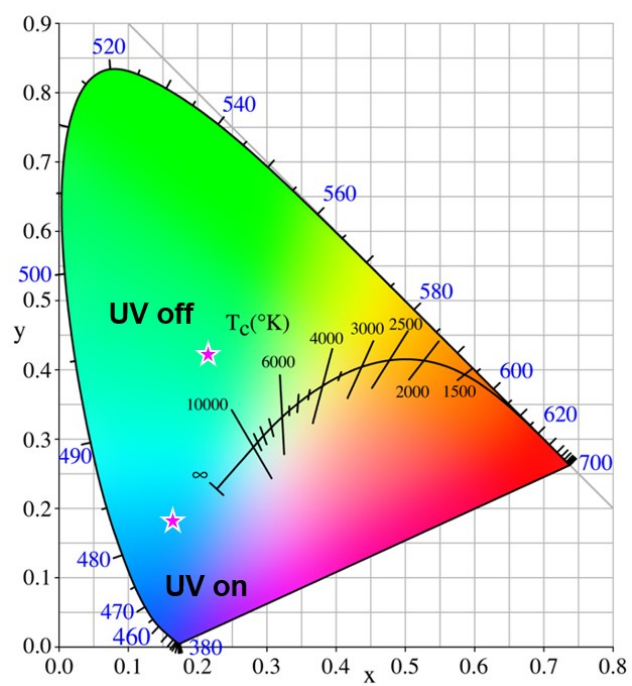

**Figure S2.** CIE coordinates of the FP-CDs before and after turning off 365 nm UV light.

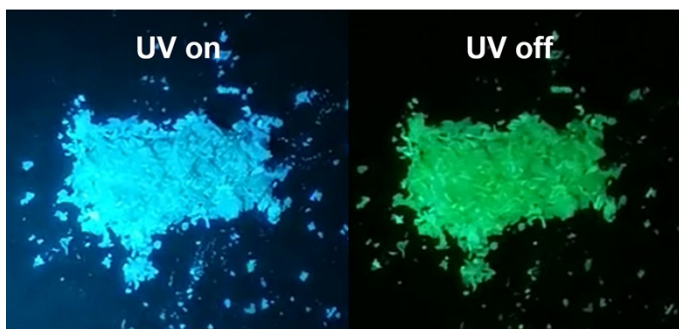

**Figure S3.** Digital photographs of the FP-CDs under 365 nm UV-on and UV-off after six months stored under ambient conditions.

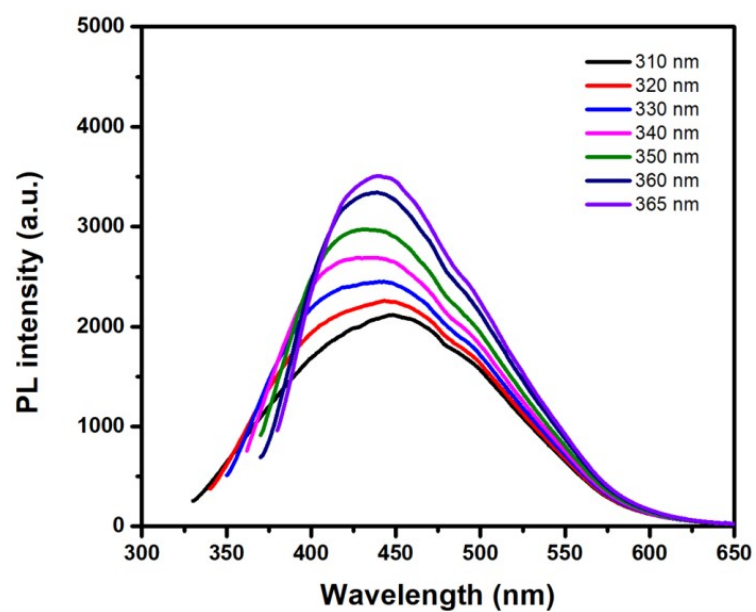

**Figure S4.** Fluorescence spectra of the FP-CDs powder under different excitation wavelength.

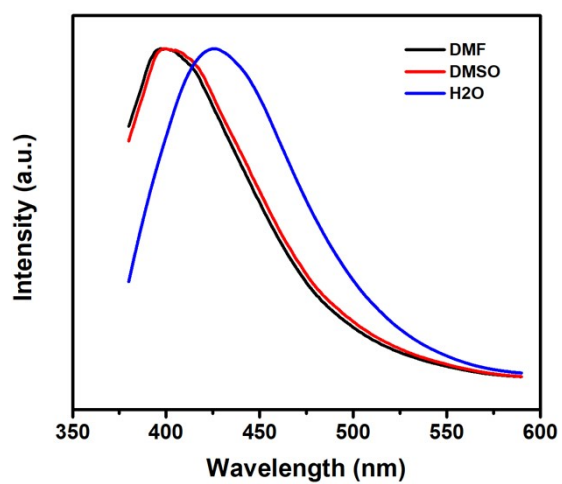

**Figure S5.** Fluorescence spectra of FP-CDs in different solvents.

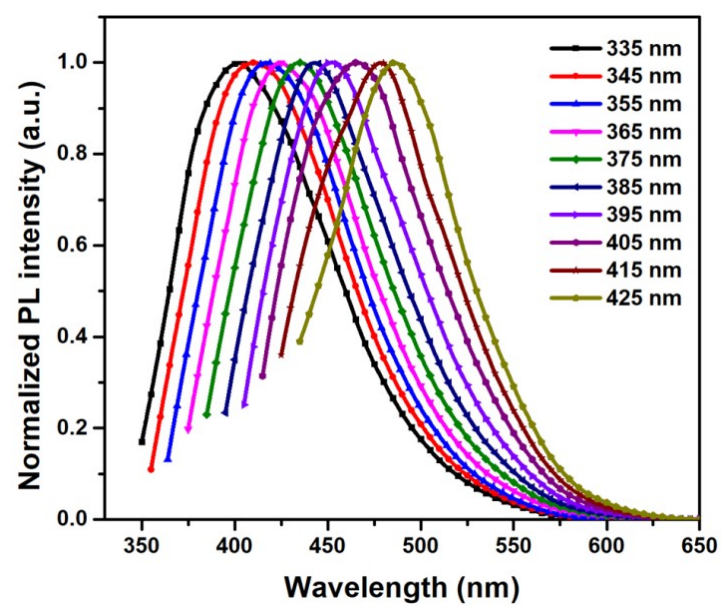

**Figure S6.** Fluorescence spectra of the FP-CDs' aqueous solution under different excitation wavelength.

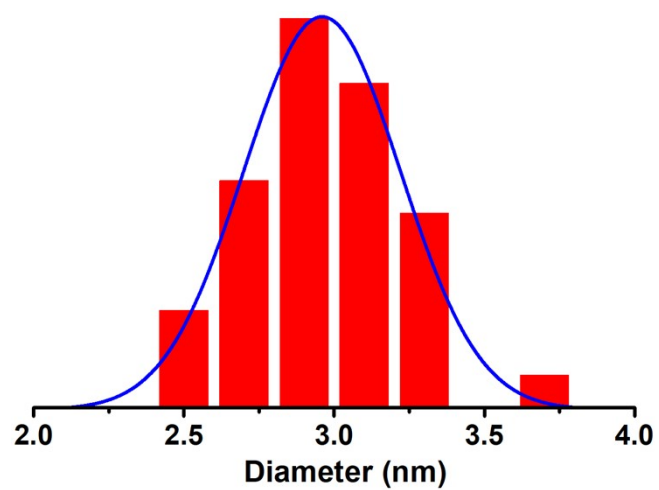

**Figure S7.** Size distribution of the FP-CDs.

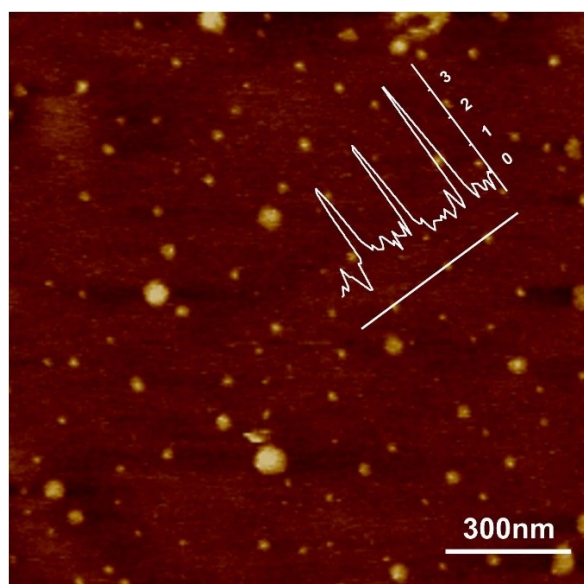

**Figure S8.** AFM image of the FP-CDs.

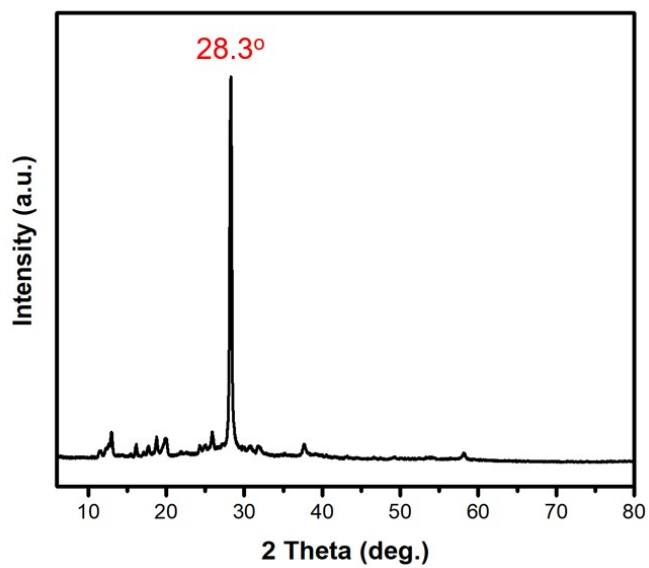

Figure S9. XRD pattern of the FP-CDs.

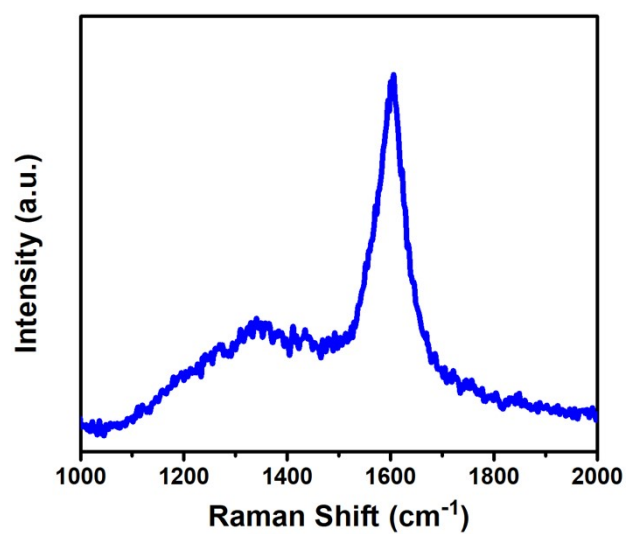

Figure S10. Raman spectrum of the FP-CDs.

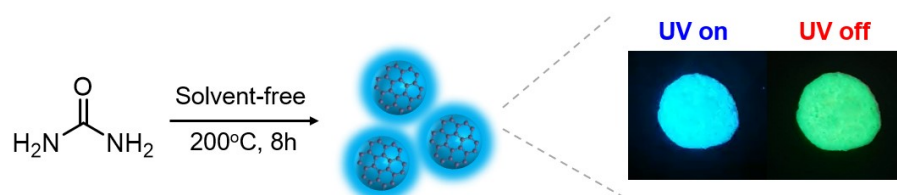

Figure S11. Schematic illustration of the pyrolysis treatment of urea.

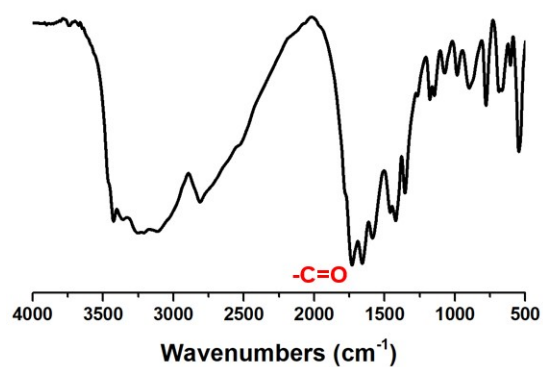

**Figure S12.** FT-IR spectrum of the pyrolysis product prepared from urea.

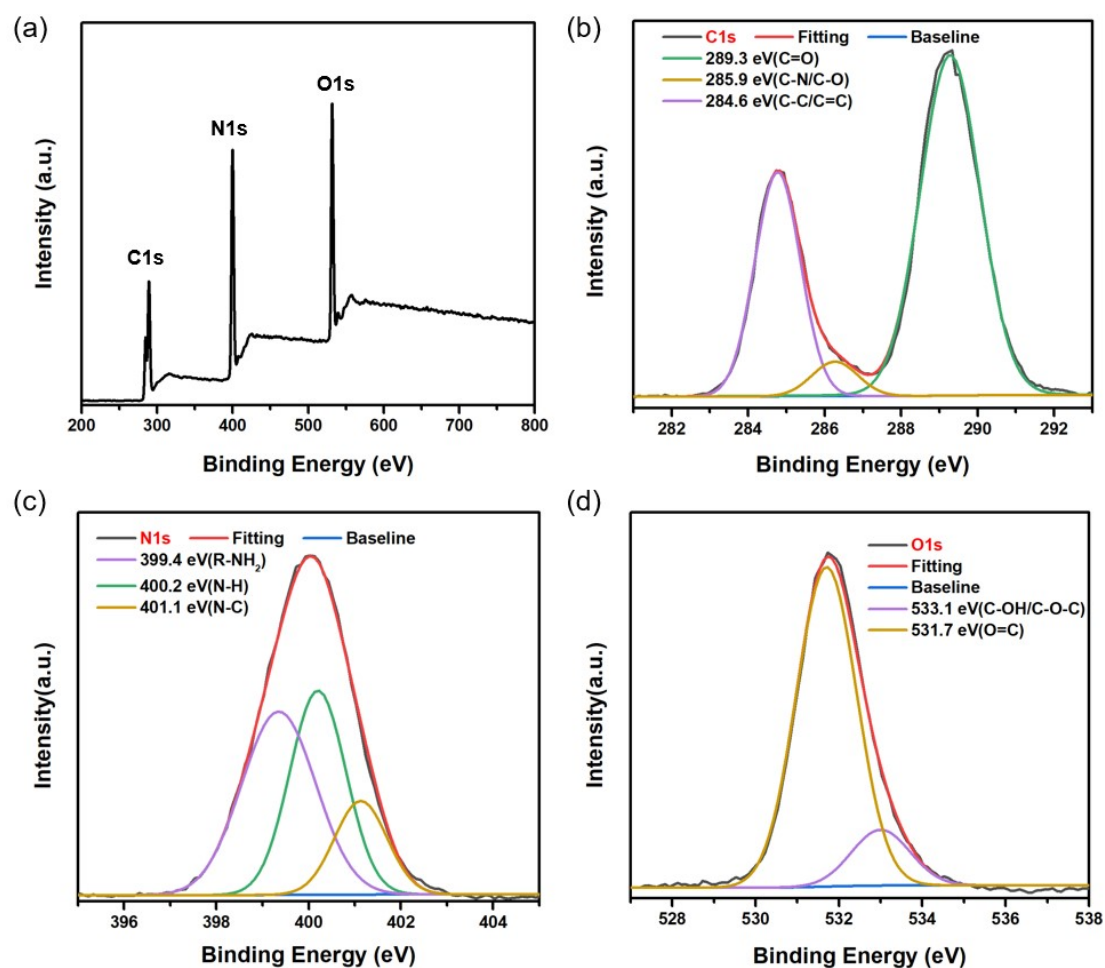

**Figure S13.** (a) XPS spectrum and high-resolution (b) C1s, (c) N1s and (d) O1s XPS spectra of the pyrolysis product prepared from urea.
